# Supplementary material for: Room-temperature diffusion of metal clusters on graphene
Source: Royal Society of Chemistry journal article supplement (doi:10.1039/d1cp00522g), 2021-01-01
Supplement: d1cp00522g1.pdf [file d1cp00522g1.pdf]

## Supplementary Information: “Room-temperature diffusion of metal clusters on graphene”

M. Zarshenas<sup>1\*</sup>, V. Gervilla<sup>1</sup>, D.G. Sangiovanni<sup>2</sup>, and K. Sarakinos<sup>1</sup>

<sup>1</sup>*Nanoscale Engineering Division, Department of Physics, Chemistry and Biology,  
Linköping University, SE-58183, Linköping, Sweden*

<sup>2</sup>*Theoretical Physics Division, Department of Physics, Chemistry and Biology, Linköping  
University, SE-58183, Linköping, Sweden*

We observe that the slopes of  $\log\text{-log } \bar{\delta}^2(\tau)$  vs.  $\tau$  curves in Fig. 2 in the main text are not constant. Hence, in order to extract  $\alpha$ , we perform a linear fit of the curves for multiple time intervals  $[0:\tau^*]$  with  $0 < \tau^* \leq 50$  ps according to the methodology presented in ref<sup>S1</sup>. Fig. S1 shows the probability distribution histograms of the slope  $\alpha$  of the  $\bar{\delta}^2(\tau)$  vs.  $\tau$  curves in Fig. 2. The distributions are described by fitting a gamma function (solid lines) from which the most probable value of  $\alpha$  and range are extracted (provided in each panel).

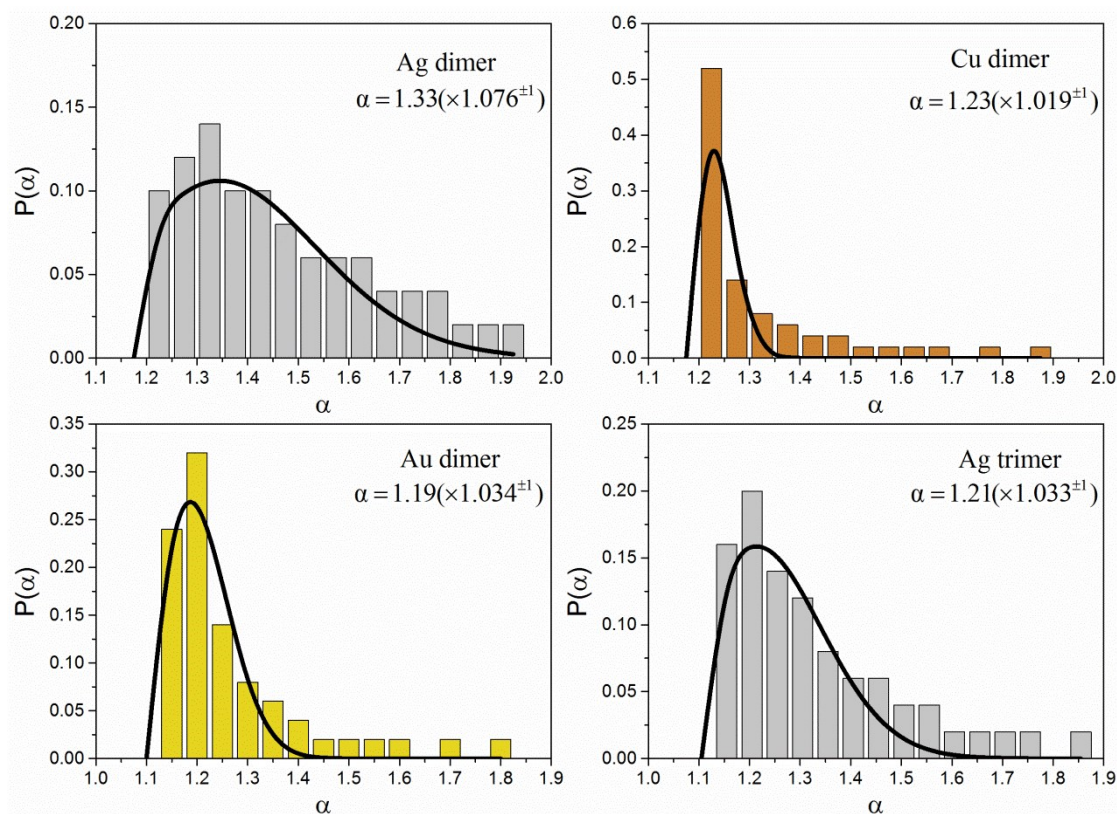

Fig S1. Histograms representing the statistical distributions of  $\bar{\delta}^2(\tau)$  vs.  $\tau$  slopes  $\alpha$  (Fig.2) as computed from trajectories presented in Fig.1 in the main article. The distributions are described by fitting a gamma function to the data from which the most probable value of  $\alpha$  and range are extracted.

## References

- S1 E. Kepten, A. Weron, G. Sikora, K. Burnecki and Y. Garini, Guidelines for the Fitting of Anomalous Diffusion Mean Square Displacement Graphs from Single Particle Tracking Experiments, *PLoS One*, 2015, **10**, 1–10.
